# Supplementary material for: Enhanced emission of a pyridine-based luminogen by hydrogen-bonding to organic and polymeric phenols
Source: Royal Society of Chemistry journal article supplement (doi:10.1039/c3ra22217a), 2013-01-01
Supplement: c3ra22217a.pdf [file c3ra22217a.pdf]

# Supporting information

## **Enhanced emission of a pyridine-based luminogen by hydrogen-bonding to organic and polymeric phenols**

Wei-Lun Chien, Chih-Min Yang, Tai-Lin Chen, Shu-Ting Li and Jin-Long Hong

Department of Materials and Optoelectronic Science, National Sun Yat-Sen  
University, Kaohsiung 80424, Taiwan, Republic of China

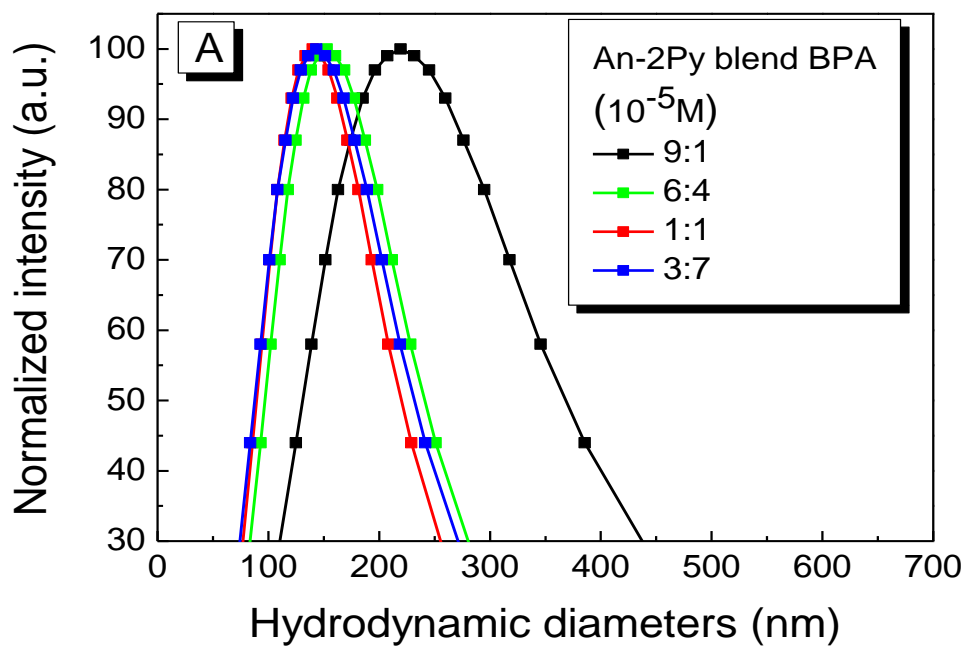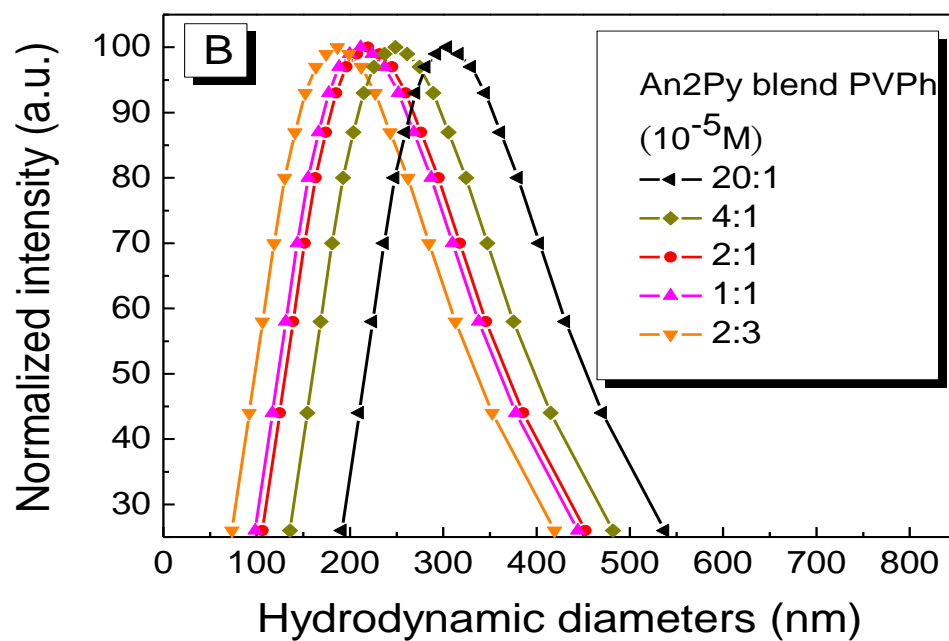

**Figure S1.** Hydrodynamic diameters of (A) An2Py/BPA(x/y) and (B) An2Py/PVPh(x/y) solutions ( $[\text{An2Py}] = 10^{-5}\text{ M}$ ).

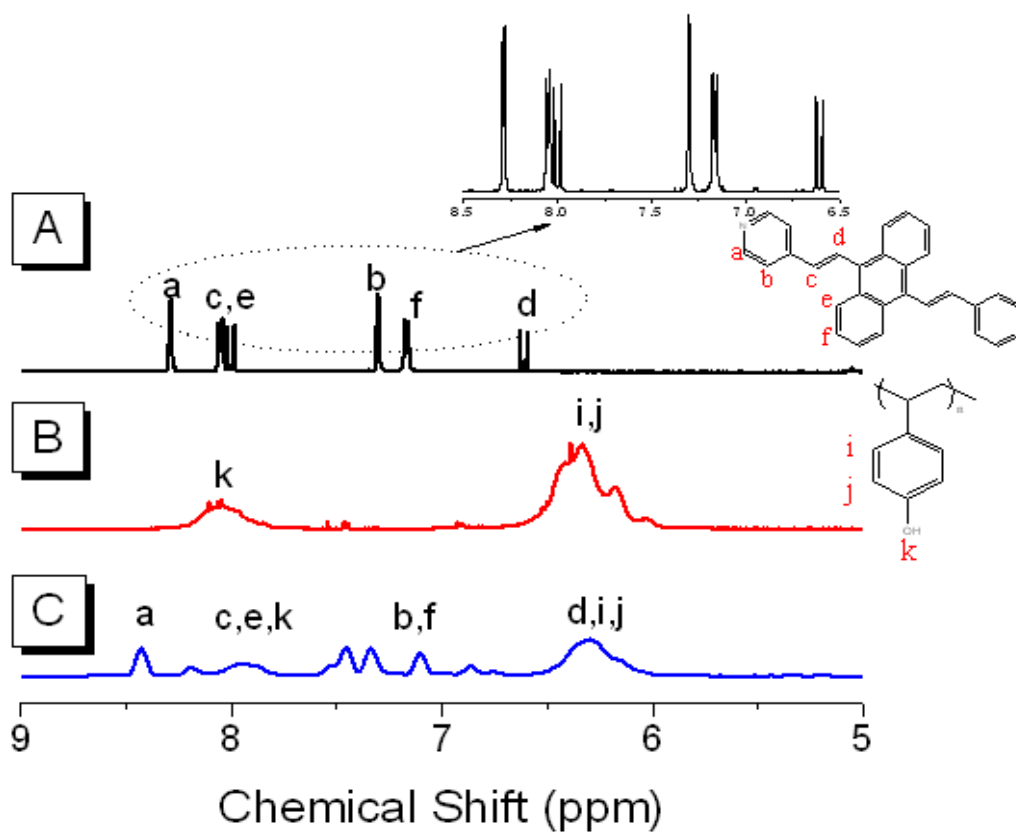

**Figure S2.** Solution <sup>1</sup>H NMR spectra of (A) An2Py(= 10<sup>-5</sup> M), (B) PVPh(= 10<sup>-5</sup> M) and (C) An2Py/PVPh(1/1) mixture (THF-d<sub>8</sub>).

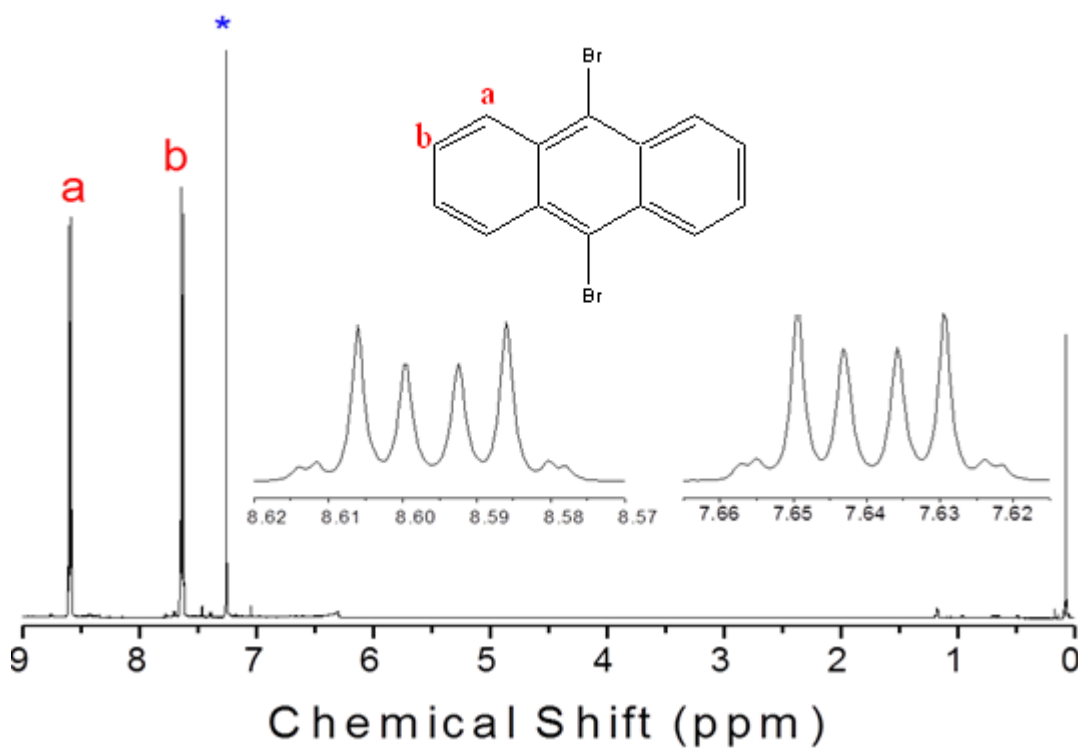

**Figure S3.** <sup>1</sup>H NMR spectra of An2Br in chloroform-d.

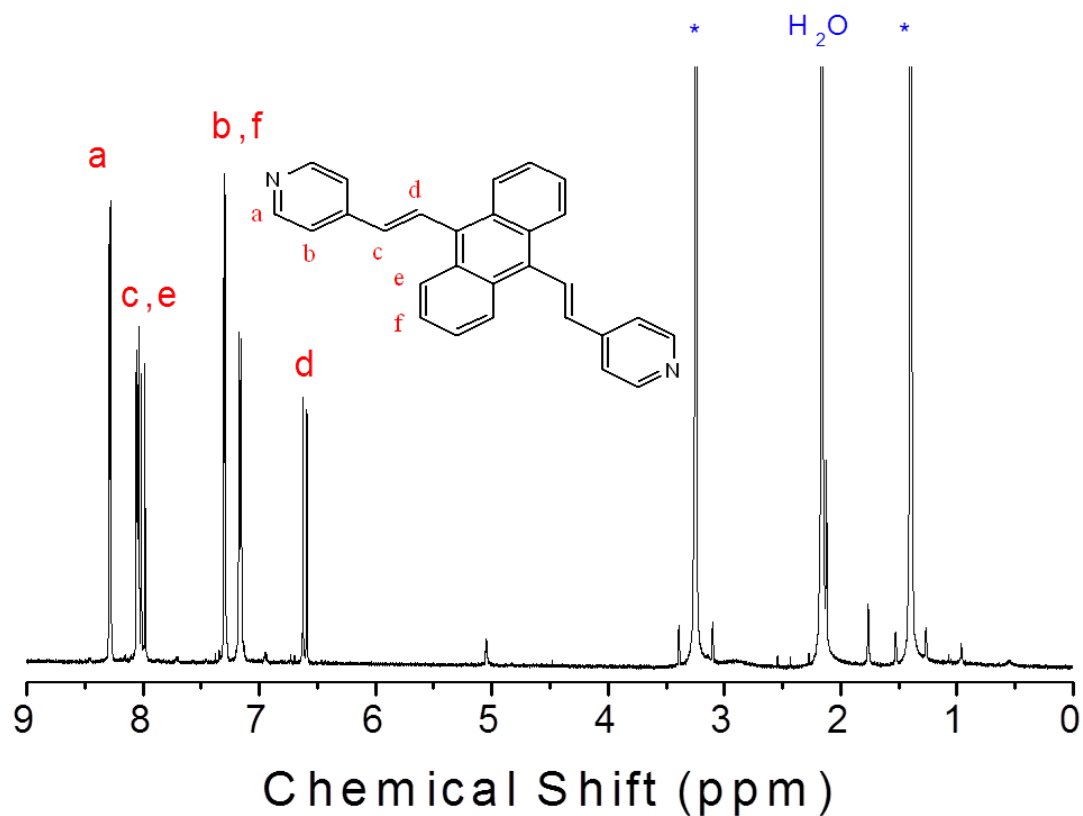

**Figure S4.** <sup>1</sup>H NMR spectra of An2Py in THF-d<sub>8</sub>.

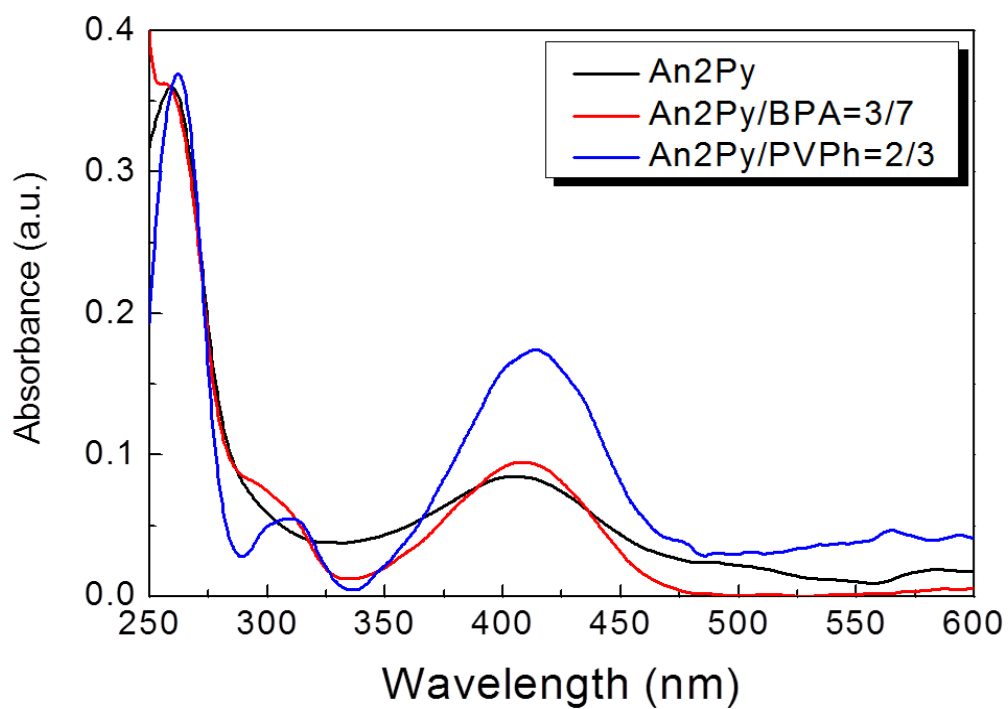

**Figure S5.** Solution UV-Vis spectra of An2Py, An2Py/BPA(3/7) and An2Py/PVPh(3/2) in THF ( $[An2Py] = 10^{-6}$  M).
